# Supplementary material
Source: PubMed Central journal article supplement (PMC3307646)
Supplement: supp_M023119_jlr.M023119-1.pdf [file supp_M023119_jlr.M023119-1.pdf]

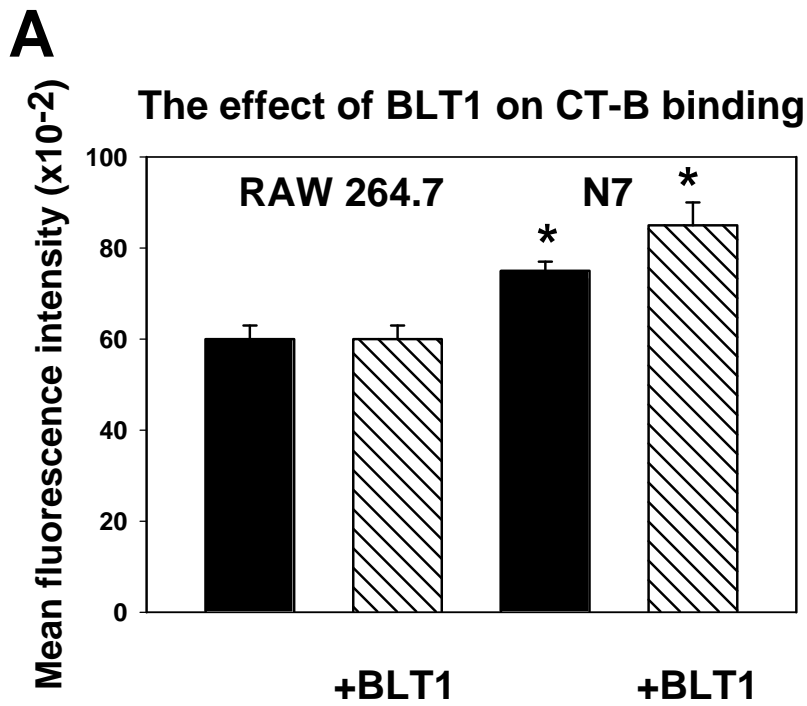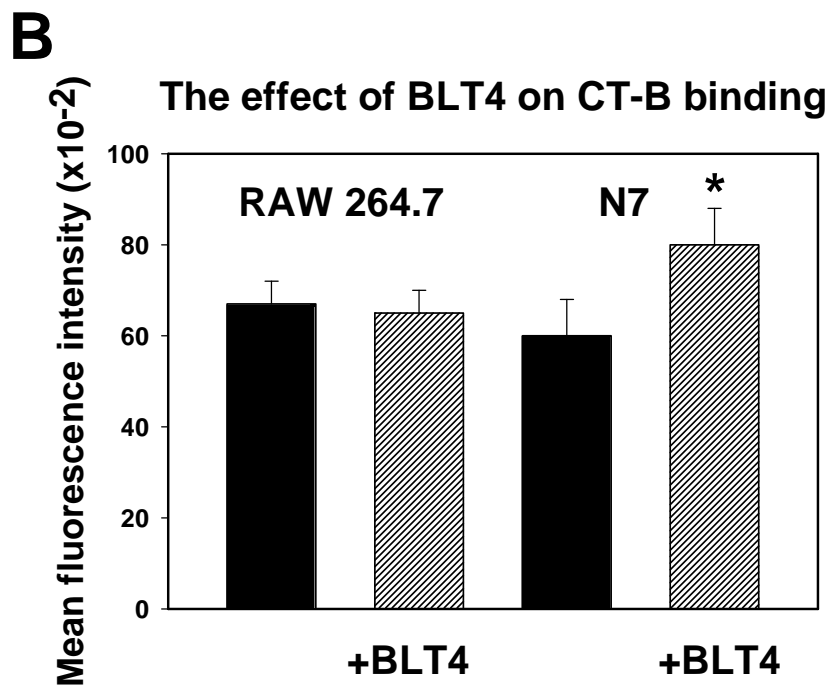

**Supplemental Figure I: The effects of BLT1 (A) and BLT4 (B) on CT-B binding.**

RAW 264.7 cells and N7 cells were treated with CdCl<sub>2</sub> and then treated for 4 h with one of the BLT compounds (final concentration 10 μM) or a vehicle. Cells were then with cholera toxin B subunit (0.5 μg/ml); binding of CT-B to GM1 (a marker of rafts) was analyzed by flow cytometry. Results are presented as Mean Fluorescence Intensity ± SEM of quadruplicate determinations. \*p<0.05 (*versus* RAW 264.7 cells).
